# Supplementary material for: Specific Cues Associated With Honey Bee Social Defence against Varroa destructor Infested Brood
Source: PubMed Central journal article supplement (PMC4853723; doi:10.1038/srep25444), 2016-05-03
Supplement: srep25444-s1.pdf [file srep25444-s1.pdf]

**Specific Cues Associated With Honey Bee Social Defence against *Varroa destructor*  
Infested Brood**

Fanny Mondet <sup>1,2</sup>, Seo Hyun Kim <sup>2</sup>, Joachim R. de Miranda <sup>3</sup>, Dominique Beslay <sup>1</sup>,  
Yves Le Conte <sup>1</sup> and Alison R. Mercer <sup>2</sup>

(1) INRA, UR 406 Abeilles et Environnement, 84914 Avignon, France

(2) Department of Zoology, University of Otago, Dunedin 9054, New Zealand

(3) Department of Ecology, Swedish University of Agricultural Sciences, 750-07 Uppsala,  
Sweden

## Supporting information

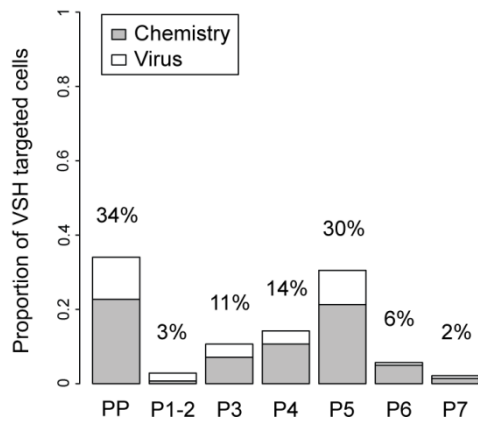

**Figure S1. Frequency plot of the different stages of VSH-targeted developing bees.**

PP, pre-pupae; P, pupae. Pupae were classified in different stages according to morphological characteristics.

**Table S1. Pair-wise squared Mahalanobis distances between the BEP profile of non-infested (NI), non-targeted (NT) and VSH-targeted (TA) brood**

|    | NI                 | NT                 |
|----|--------------------|--------------------|
|    | D = 0.606          |                    |
| NT | $F_{7,55} = 0.917$ |                    |
|    | P = 0.5            |                    |
|    | D = 2.661          | D = 2.461          |
| TA | $F_{7,55} = 3.351$ | $F_{7,55} = 3.154$ |
|    | <b>P = 0.0048</b>  | <b>P = 0.0071</b>  |

P-values that are significant at the 5% probability after Bonferroni's correction are indicated in bold (P = 0.015).

**Table S2. Primer sequences and performance indicators of the RT-qPCR assays run for the different honey bee viruses**

| Target          | Primers      | Sequence (5' – 3')    | Size (bp) | E     | r <sup>2</sup> | Tm (°C) |
|-----------------|--------------|-----------------------|-----------|-------|----------------|---------|
| DWV             | DWV-F8688    | GGTAAGCGATGGTTGTTTG   | 143       | 2.014 | 0.982          | 79.5    |
|                 | DWV-B8794    | CCGTGAATATAGTGTGAGG   |           |       |                |         |
| KBV             | KBV-F6639    | CCATACCTGCTGATAACC    | 200       | 1.870 | 0.995          | 82.5    |
|                 | KIABPV-B6707 | CTGAATAATACTGTGCGTATC |           |       |                |         |
| SBV             | SBV-qF3164   | TTGGAACTACGCATTCTCTG  | 335       | 1.884 | 0.995          | 81.6    |
|                 | SBV-qB3461   | CTCTAACCTCGCATCAAC    |           |       |                |         |
| RNA250 (Ambion) | RNA250-F     | TGGTGCCTGGGCGGTAAAG   | 227       | 2.018 | 0.995          | 86.7    |
|                 | RNA250-R     | TGCGGGGACTCACTGGCTG   |           |       |                |         |
